# Supplementary material for: Overexpression of AtNCED3 gene improved drought tolerance in soybean in greenhouse and field conditions
Source: PubMed Central journal article supplement (PMC7278712; doi:10.1590/1678-4685-gmb-2019-0292), 2020-06-08
Supplement: 1415-4757-GMB-43-3-e20190292-suppl2.pdf [file 1415-4757-GMB-43-3-e20190292-suppl2.pdf]

**Supplementary Material to "Overexpression of AtNCED3 gene improved drought tolerance in soybean in greenhouse and field conditions"**

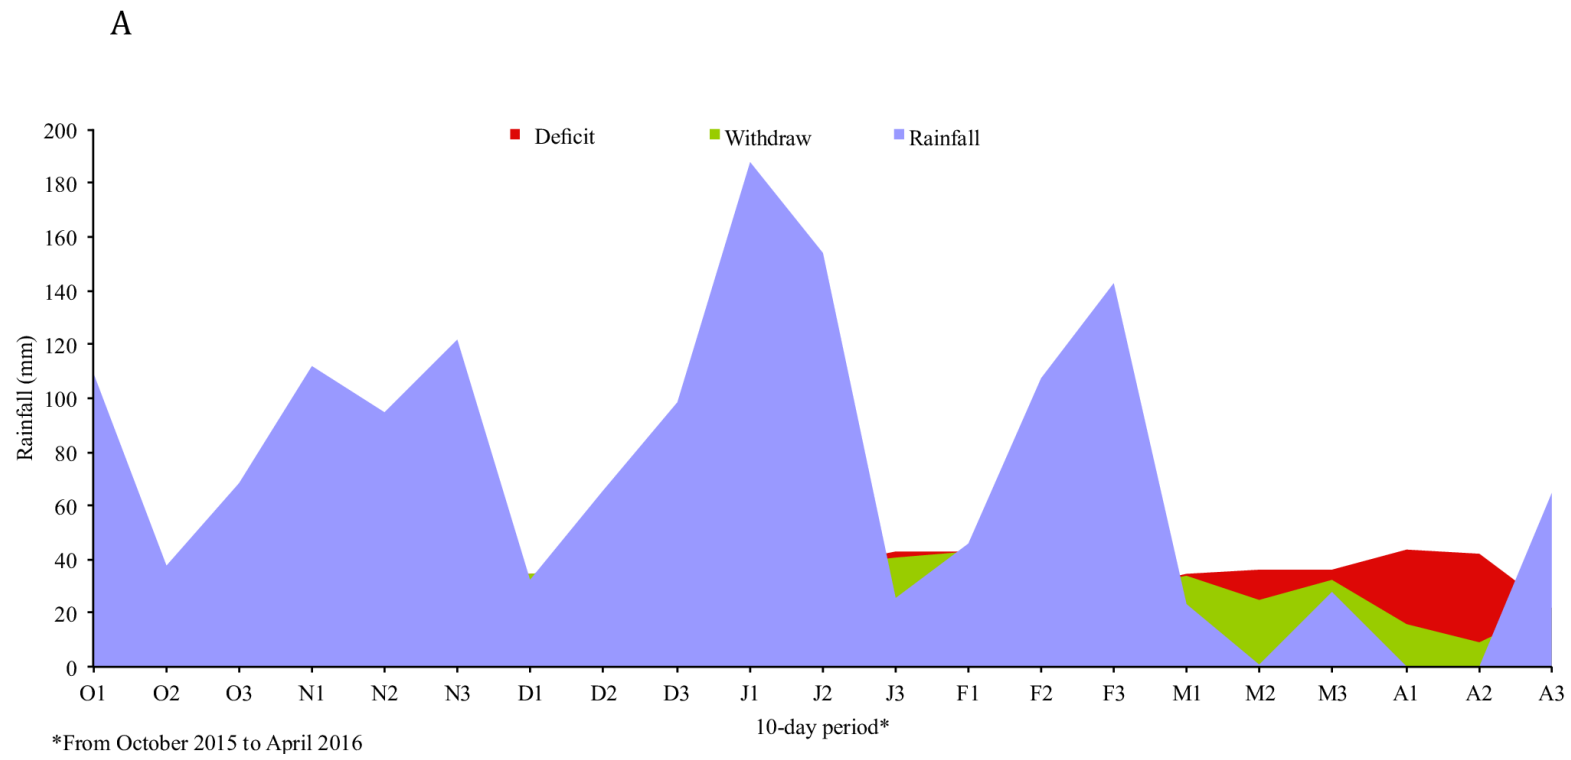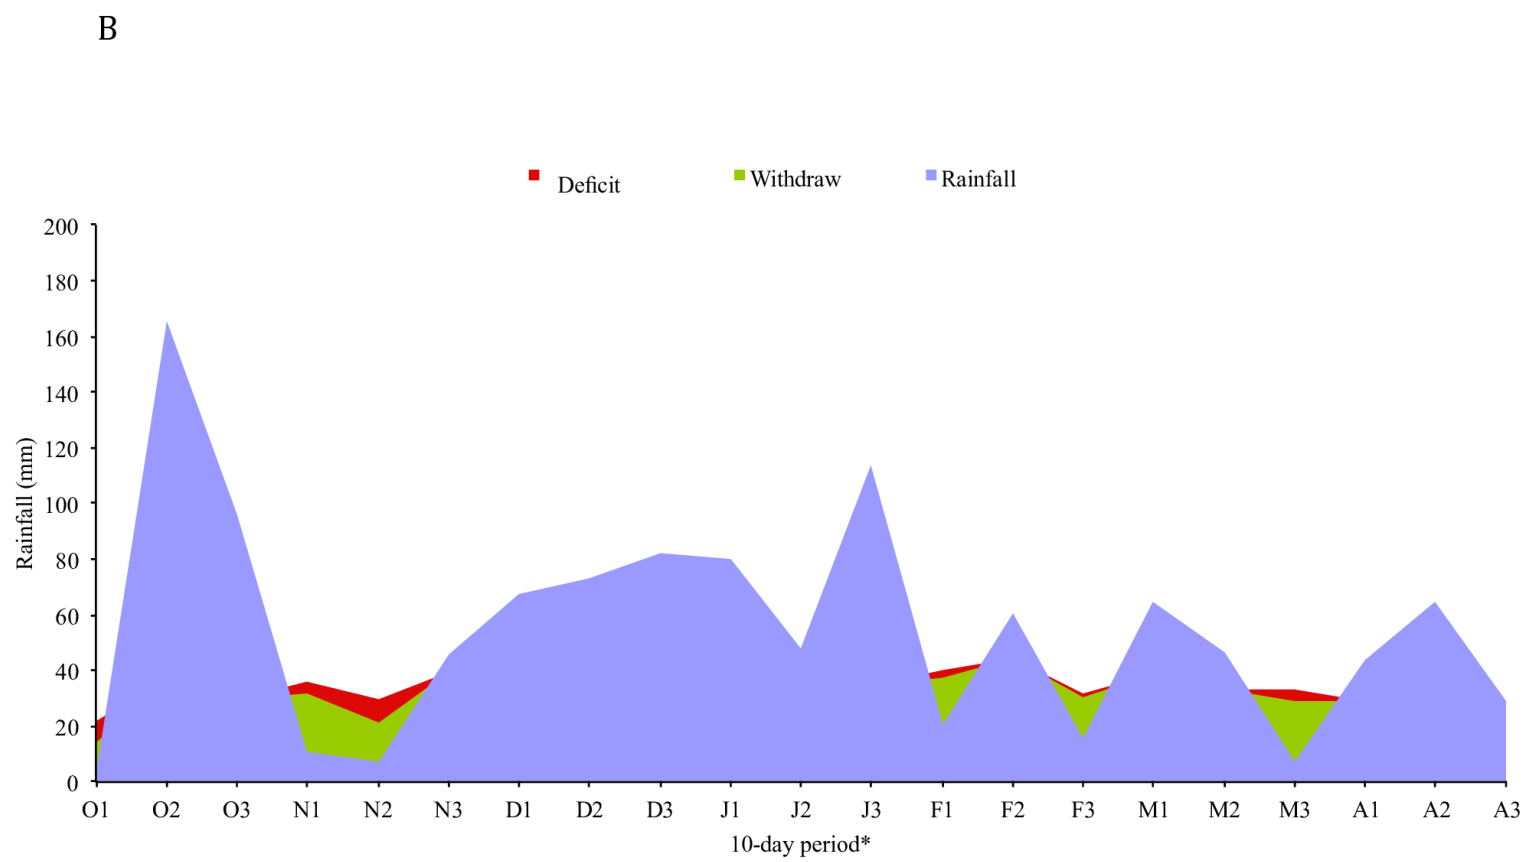

**Figure S2** - In A, water balance from crop seasons 2015-2016 and in B, from 2016-2017. Data were obtained from October to April, every 10-days period. Graphics show rainfall, deficit and water withdraw.
