# Supplementary material for: Overexpression of AtNCED3 gene improved drought tolerance in soybean in greenhouse and field conditions
Source: PubMed Central journal article supplement (PMC7278712; doi:10.1590/1678-4685-gmb-2019-0292), 2020-06-08
Supplement: 1415-4757-GMB-43-3-e20190292-suppl3.pdf [file 1415-4757-GMB-43-3-e20190292-suppl3.pdf]

## Supplementary Material to "Overexpression of *AtNCED3* gene improved drought tolerance in soybean in greenhouse and field conditions"

**Table S1** - In A, primer sequences used to identify positive events for *AtNCED3* construct by conventional PCR; in B, Primer sequences for *AtNCED3* and *GmLectina* genes, used to perform gene expression quantification by RT-qPCR and in C, primer sequences for *AtNCED3*, *GmAAO3*, *GmAREB1*, *GmSnRK2*, *GmPP2C* and *Gmβ-actina* genes used to perform gene expression quantification by RT-qPCR.

**A** Primer sequences used to identify positive events for *AtNCED3* construct by conventional PCR.

| Primers          | Sequences (5'-3')          | Amplicon size (bp) |
|------------------|----------------------------|--------------------|
| <i>AtNCED3-F</i> | TCTAGAATGGCTTCTTTCACGGCAAC | 979                |
| <i>AtNCED3-R</i> | GGATCCTCACACGCACTGCTTCGCCA |                    |
| <i>GmGUS-F</i>   | CGTCCTGTAGAAACCCC          | 1813               |
| <i>GmGUS-R</i>   | GCGCGGTACGGTAGGAGTTG       |                    |

**B.** Primer sequences for *AtNCED3* and *GmLectina* genes, used to perform gene expression quantification by RT-qPCR.

| Primers            | Sequences (5'-3')    | Amplicon size (bp) |
|--------------------|----------------------|--------------------|
| <i>AtNCED3-F</i>   | CAAGTTCAGATCACTCCCAA | 129                |
| <i>AtNCED3-R</i>   | GCTTAAAGCGAAGAGTTCAC |                    |
| <i>GmLectina-F</i> | TCCCGAGTGGGTGAGGATAG | 85                 |
| <i>GmLectina-R</i> | CATGCGATTCCCCAGGTATG |                    |

**C.** Primer sequences for *AtNCED3*, *GmAAO3*, *GmAREB1*, *GmSnRK2*, *GmPP2C* and *Gmβ-actina* genes used to perform gene expression quantification by RT-qPCR.

| Primers             | Sequences (5' – 3')       | Amplicon size (bp) |
|---------------------|---------------------------|--------------------|
| <i>AtNCED3-F</i>    | CAAGTTCAGATCACTCCCAA      | 129                |
| <i>AtNCED3-R</i>    | GCTTAAAGCGAAGAGTTCAC      |                    |
| <i>GmAAO3-F</i>     | ACACTACTTTGCAGCATACA      | 142                |
| <i>GmAAO3-R</i>     | CACACATTCCAGGAGTACAA      |                    |
| <i>GmAREB1-F</i>    | AATAGAGAATCAGCTGCGAG      | 80                 |
| <i>GmAREB1-R</i>    | GCTGAGGTTGCAAACTTAA       |                    |
| <i>GmPP2C-F</i>     | GCTATGTTGATTTATGCCGTGGTG  | 115                |
| <i>GmPP2C-R</i>     | ACTTTGGTCTCAGGCTCTGCTGTCA |                    |
| <i>GmSnRK2-F</i>    | CAAAGTGATCTCATGGATGGGA    | 215                |
| <i>GmSnRK2-R</i>    | TGCTATCTAAGTCAAGGTCAGGATC |                    |
| <i>Gmβ-actina-F</i> | GAGCTATGAATTGCCTGATGG     | 118                |
| <i>Gmβ-actina-R</i> | CGTTTCATGAATTCCAGTAGC     |                    |
